# Supplementary material for: Scalable and selective deuteration of (hetero)arenes
Source: Nat Chem. 2022 Jan 13;14(3):334–41. doi: 10.1038/s41557-021-00846-4 (PMC8898765; doi:10.1038/s41557-021-00846-4)
Supplement: Supplementary file 190 [file 41557_2021_846_MOESM189_ESM.mol]

nchem.20102436C-comp95b.mol
  ChemDraw10072100162D

 16 16  0  0  0  0  0  0  0  0999 V2000
   -1.7862   -0.0000    0.0000 C   0  0  0  0  0  0  0  0  0  0  0  0
   -1.0717   -0.4125    0.0000 C   0  0  0  0  0  0  0  0  0  0  0  0
   -0.3572   -0.0000    0.0000 C   0  0  0  0  0  0  0  0  0  0  0  0
   -0.3572    0.8250    0.0000 C   0  0  0  0  0  0  0  0  0  0  0  0
   -1.0717    1.2375    0.0000 C   0  0  0  0  0  0  0  0  0  0  0  0
   -1.7862    0.8250    0.0000 C   0  0  0  0  0  0  0  0  0  0  0  0
    0.3572   -0.4125    0.0000 N   0  0  0  0  0  0  0  0  0  0  0  0
   -2.5006    1.2375    0.0000 C   0  0  0  0  0  0  0  0  0  0  0  0
   -2.5006   -0.4125    0.0000 Cl  0  0  0  0  0  0  0  0  0  0  0  0
    1.0717   -0.0000    0.0000 C   0  0  0  0  0  0  0  0  0  0  0  0
    1.7862   -0.4125    0.0000 N   0  0  0  0  0  0  0  0  0  0  0  0
    1.0717    0.8250    0.0000 O   0  0  0  0  0  0  0  0  0  0  0  0
    2.5006   -0.0000    0.0000 C   0  0  0  0  0  0  0  0  0  0  0  0
    1.7862   -1.2375    0.0000 C   0  0  0  0  0  0  0  0  0  0  0  0
    0.3572    1.2375    0.0000 D   0  0  0  0  0  0  0  0  0  0  0  0
   -1.0717   -1.2375    0.0000 D   0  0  0  0  0  0  0  0  0  0  0  0
  1  2  1  0      
  2  3  2  0      
  3  4  1  0      
  4  5  2  0      
  5  6  1  0      
  1  6  2  0      
  3  7  1  0      
  6  8  1  0      
  1  9  1  0      
  7 10  1  0      
 10 11  1  0      
 10 12  2  0      
 11 13  1  0      
 11 14  1  0      
  4 15  1  0      
  2 16  1  0      
M  END
